# Supplementary material for: Precision phenylalanine sensing in blood with nanomaterial-enhanced electrodes
Source: Royal Society of Chemistry journal article supplement (doi:10.1039/d4ra05045b), 2024-01-01
Supplement: d4ra05045b1.pdf [file d4ra05045b1.pdf]

## Supplementary Material

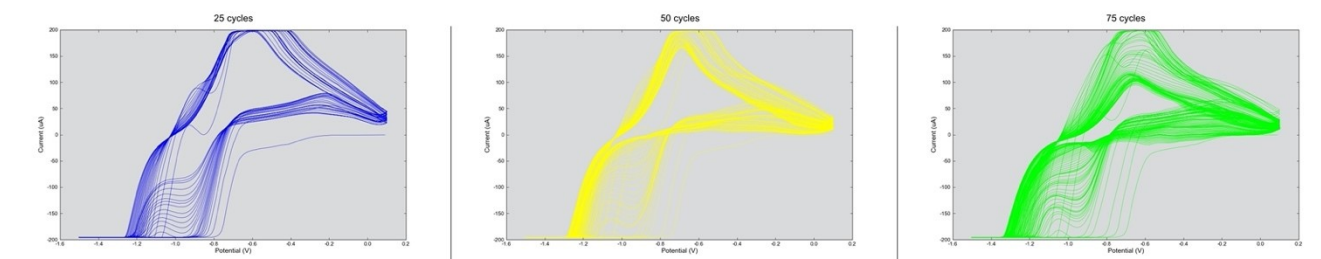

**Supplementary Figure 1.** CV curves of GO electrodes in phosphate buffer solution at pH 6 under different scan rates (at  $100 \text{ mV s}^{-1}$  between 0.1 and -1.5 V) for 25, 50 and 75 cycles.

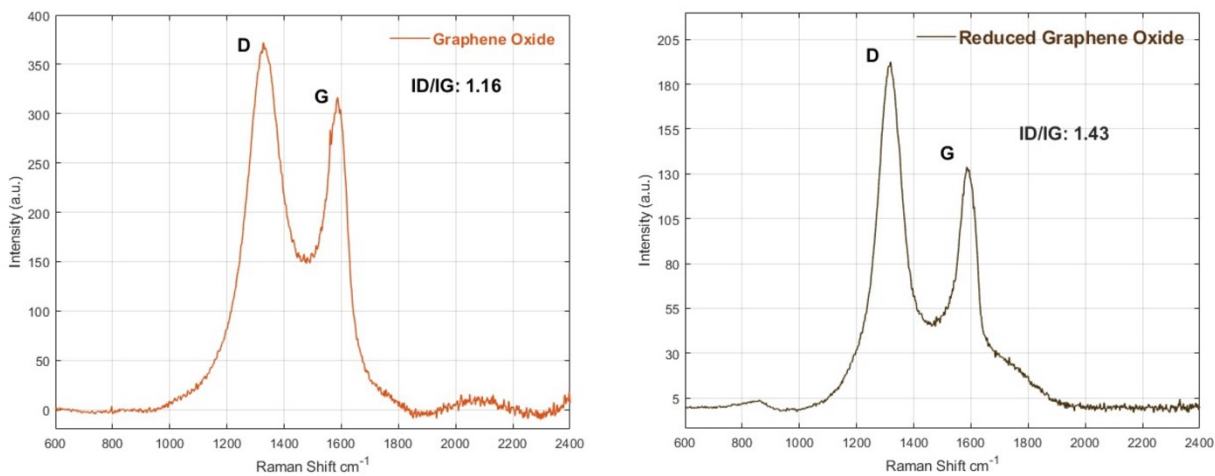

**Supplementary Figure 2.** Raman spectra of GO (left panel) and ERGO (right panel) electrodes. The spectral profiles and ID/IG ratios indicated a successful reduction of GO through cyclic voltammetry.
